# Supplementary material for: Novel Synthesis Methods of New Imidazole-Containing Coordination Compounds Tc(IV, V, VII)—Reaction Mechanism, Xrd and Hirshfeld Surface Analysis
Source: MDPI journal article supplement (doi:10.3390/ijms23169461), 2022-08-21
Supplement: s1 [file s1]

# Novel synthesis methods of new imidazole-containing coordination compounds and salts Tc(IV, V, VII) – reaction mechanism, XRD and Hirshfeld surface analysis

Mikhail Alexandrovich Volkov \*, Anton Petrovich Novikov, Mikhail Semenovich Grigoriev, Alexander Mikhailovich Fedoseev and Konstantin Eduardovich German

Frumkin Institute of Physical Chemistry and Electrochemistry, Russian Academy of Sciences, Leninskii prospect 31-4, 119071 Moscow, Russia; tony.novickoff@yandex.ru (A.P.N.); mickgrig@mail.ru (M.S.G.); a.fedosseev@gmail.com (A.M.F.); guerman\_k@mail.ru (K.E.G.)

\* Correspondence: mikhailalexvol@gmail.com

**Table S1.** Bond Lengths for **II** at 100 K.

| Atom | Atom | Length/Å |  | Atom | Atom | Length/Å |
|------|------|----------|--|------|------|----------|
| Tc1  | O1   | 1.745(2) |  | N4   | C6   | 1.363(5) |
| Tc1  | O2   | 1.755(2) |  | N5   | C7   | 1.327(4) |
| Tc1  | N1   | 2.125(3) |  | N5   | C8   | 1.372(5) |
| Tc1  | N3   | 2.135(3) |  | N6   | C7   | 1.349(4) |
| Tc1  | N5   | 2.122(2) |  | N6   | C9   | 1.376(5) |
| Tc1  | N7   | 2.140(3) |  | N7   | C10  | 1.322(5) |
| N1   | C1   | 1.323(4) |  | N7   | C12  | 1.378(4) |
| N1   | C3   | 1.380(5) |  | N8   | C10  | 1.346(5) |
| N2   | C1   | 1.338(5) |  | N8   | C11  | 1.374(5) |
| N2   | C2   | 1.360(5) |  | C2   | C3   | 1.356(5) |
| N3   | C4   | 1.322(4) |  | C5   | C6   | 1.361(5) |
| N3   | C5   | 1.372(5) |  | C8   | C9   | 1.358(5) |
| N4   | C4   | 1.335(5) |  | C11  | C12  | 1.357(5) |

**Table S2.** Bond Angles for **II** at 100K.

| Atom | Atom | Atom | Angle/°    |  | Atom | Atom | Atom | Angle/°  |
|------|------|------|------------|--|------|------|------|----------|
| O1   | Tc1  | O2   | 178.40(13) |  | C4   | N4   | C6   | 108.5(3) |
| O1   | Tc1  | N1   | 89.24(11)  |  | C7   | N5   | Tc1  | 124.8(2) |
| O1   | Tc1  | N3   | 88.58(11)  |  | C7   | N5   | C8   | 106.8(3) |
| O1   | Tc1  | N5   | 89.12(10)  |  | C8   | N5   | Tc1  | 128.3(2) |
| O1   | Tc1  | N7   | 89.56(10)  |  | C7   | N6   | C9   | 107.8(3) |
| O2   | Tc1  | N1   | 92.36(12)  |  | C10  | N7   | Tc1  | 124.4(2) |
| O2   | Tc1  | N3   | 89.82(12)  |  | C10  | N7   | C12  | 105.9(3) |
| O2   | Tc1  | N5   | 90.78(10)  |  | C12  | N7   | Tc1  | 129.7(2) |

|    |     |     |            |  |     |     |     |          |
|----|-----|-----|------------|--|-----|-----|-----|----------|
| O2 | Tc1 | N7  | 90.56(11)  |  | C10 | N8  | C11 | 107.8(3) |
| N1 | Tc1 | N3  | 177.79(12) |  | N1  | C1  | N2  | 110.5(3) |
| N1 | Tc1 | N7  | 89.67(11)  |  | C3  | C2  | N2  | 106.7(4) |
| N3 | Tc1 | N7  | 89.95(10)  |  | C2  | C3  | N1  | 108.6(3) |
| N5 | Tc1 | N1  | 89.66(11)  |  | N3  | C4  | N4  | 110.5(3) |
| N5 | Tc1 | N3  | 90.67(11)  |  | C6  | C5  | N3  | 109.6(3) |
| N5 | Tc1 | N7  | 178.53(11) |  | C5  | C6  | N4  | 105.4(4) |
| C1 | N1  | Tc1 | 125.3(3)   |  | N5  | C7  | N6  | 110.0(3) |
| C1 | N1  | C3  | 106.3(3)   |  | C9  | C8  | N5  | 109.2(3) |
| C3 | N1  | Tc1 | 128.4(2)   |  | C8  | C9  | N6  | 106.2(3) |
| C1 | N2  | C2  | 108.0(3)   |  | N7  | C10 | N8  | 110.7(3) |
| C4 | N3  | Tc1 | 127.6(3)   |  | C12 | C11 | N8  | 105.8(3) |
| C4 | N3  | C5  | 105.9(3)   |  | C11 | C12 | N7  | 109.7(3) |
| C5 | N3  | Tc1 | 126.6(2)   |  |     |     |     |          |

**Table S3.** Hydrogen Bonds for **II** at 100K.

| D   | H    | A                | d(D-H)/Å | d(H-A)/Å | d(D-A)/Å | D-H-A/° |
|-----|------|------------------|----------|----------|----------|---------|
| O1W | H1WA | O2W <sup>1</sup> | 0.85(2)  | 1.87(2)  | 2.724(4) | 173(4)  |
| O1W | H1WB | Br1 <sup>1</sup> | 0.86(2)  | 2.51(2)  | 3.363(3) | 176(5)  |
| O2W | H2WA | O1               | 0.83(2)  | 1.93(2)  | 2.698(3) | 153(4)  |
| O2W | H2WB | O2 <sup>2</sup>  | 0.83(2)  | 1.91(2)  | 2.694(4) | 156(4)  |
| N2  | H2   | O1W <sup>3</sup> | 0.88     | 1.93     | 2.797(4) | 166.7   |
| N4  | H4   | Br1 <sup>4</sup> | 0.88     | 2.50     | 3.293(3) | 150.3   |
| N6  | H6   | O2W <sup>1</sup> | 0.88     | 1.93     | 2.783(4) | 162.4   |
| N8  | H8   | Br1              | 0.88     | 2.55     | 3.346(3) | 150.7   |
| C9  | H9   | O1W <sup>5</sup> | 0.95     | 2.41     | 3.108(4) | 129.9   |

<sup>1</sup>+X,1-Y,1/2+Z; <sup>2</sup>1/2+X,1/2+Y,+Z; <sup>3</sup>-1/2+X,3/2-Y,-1/2+Z; <sup>4</sup>+X,-Y,1/2+Z; <sup>5</sup>-1/2+X,-1/2+Y,+Z

**Table S4.** Torsion Angles for **II** at 100 K.

| A   | B  | C   | D   | Angle/°   | A  | B  | C  | D  | Angle/° |
|-----|----|-----|-----|-----------|----|----|----|----|---------|
| Tc1 | N1 | C1  | N2  | 178.0(2)  | C2 | N2 | C1 | N1 | 0.0(4)  |
| Tc1 | N1 | C3  | C2  | -177.9(2) | C3 | N1 | C1 | N2 | -0.2(4) |
| Tc1 | N3 | C4  | N4  | 178.5(2)  | C4 | N3 | C5 | C6 | 0.3(4)  |
| Tc1 | N3 | C5  | C6  | -178.1(2) | C4 | N4 | C6 | C5 | 0.5(4)  |
| Tc1 | N5 | C7  | N6  | -179.6(2) | C5 | N3 | C4 | N4 | 0.0(4)  |
| Tc1 | N5 | C8  | C9  | 179.8(2)  | C6 | N4 | C4 | N3 | -0.4(4) |
| Tc1 | N7 | C10 | N8  | 178.8(2)  | C7 | N5 | C8 | C9 | 0.3(4)  |
| Tc1 | N7 | C12 | C11 | -178.6(3) | C7 | N6 | C9 | C8 | 0.2(4)  |

|    |     |     |    |         |  |     |    |     |     |         |
|----|-----|-----|----|---------|--|-----|----|-----|-----|---------|
| N2 | C2  | C3  | N1 | -0.3(4) |  | C8  | N5 | C7  | N6  | -0.1(4) |
| N3 | C5  | C6  | N4 | -0.5(4) |  | C9  | N6 | C7  | N5  | -0.1(4) |
| N5 | C8  | C9  | N6 | -0.3(4) |  | C10 | N7 | C12 | C11 | 0.8(4)  |
| N8 | C11 | C12 | N7 | -0.6(4) |  | C10 | N8 | C11 | C12 | 0.3(4)  |
| C1 | N1  | C3  | C2 | 0.3(4)  |  | C11 | N8 | C10 | N7  | 0.2(5)  |
| C1 | N2  | C2  | C3 | 0.2(4)  |  | C12 | N7 | C10 | N8  | -0.6(4) |

**Table S5.** Bond Lengths for **III** at 100 K.

| Atom | Atom | Length/Å |  | Atom | Atom | Length/Å |
|------|------|----------|--|------|------|----------|
| Tc1  | O1   | 1.763(2) |  | N2   | C2   | 1.377(4) |
| Tc1  | O2   | 1.743(2) |  | N2   | C1   | 1.343(4) |
| Tc1  | N1   | 2.140(3) |  | N2   | C13  | 1.469(4) |
| Tc1  | N3   | 2.130(2) |  | N1   | C3   | 1.378(4) |
| Tc1  | N7   | 2.132(3) |  | N1   | C1   | 1.331(4) |
| Tc1  | N5   | 2.135(2) |  | N3   | C4   | 1.329(4) |
| N6   | C15  | 1.466(4) |  | N3   | C5   | 1.376(4) |
| N6   | C9   | 1.374(4) |  | N7   | C12  | 1.385(4) |
| N6   | C7   | 1.352(4) |  | N7   | C10  | 1.333(4) |
| N8   | C11  | 1.375(4) |  | N5   | C8   | 1.377(4) |
| N8   | C16  | 1.462(4) |  | N5   | C7   | 1.325(4) |
| N8   | C10  | 1.346(4) |  | C3   | C2   | 1.356(4) |
| N4   | C4   | 1.345(4) |  | C8   | C9   | 1.363(4) |
| N4   | C6   | 1.372(4) |  | C6   | C5   | 1.358(4) |
| N4   | C14  | 1.471(4) |  | C11  | C12  | 1.359(4) |

**Table S6.** Bond Angles for **III** at 100 K.

| Atom | Atom | Atom | Angle/°    |  | Atom | Atom | Atom | Angle/°  |
|------|------|------|------------|--|------|------|------|----------|
| O1   | Tc1  | N1   | 89.58(10)  |  | C1   | N2   | C13  | 126.1(3) |
| O1   | Tc1  | N3   | 90.56(10)  |  | C3   | N1   | Tc1  | 124.7(2) |
| O1   | Tc1  | N7   | 89.85(10)  |  | C1   | N1   | Tc1  | 129.1(2) |
| O1   | Tc1  | N5   | 90.04(10)  |  | C1   | N1   | C3   | 106.0(3) |
| O2   | Tc1  | O1   | 178.13(10) |  | C4   | N3   | Tc1  | 128.7(2) |
| O2   | Tc1  | N1   | 89.78(10)  |  | C4   | N3   | C5   | 106.1(3) |
| O2   | Tc1  | N3   | 90.07(10)  |  | C5   | N3   | Tc1  | 125.1(2) |
| O2   | Tc1  | N7   | 88.38(10)  |  | C12  | N7   | Tc1  | 127.8(2) |
| O2   | Tc1  | N5   | 91.73(10)  |  | C10  | N7   | Tc1  | 126.2(2) |
| N3   | Tc1  | N1   | 179.75(10) |  | C10  | N7   | C12  | 106.0(3) |
| N3   | Tc1  | N7   | 90.41(9)   |  | C8   | N5   | Tc1  | 126.9(2) |
| N3   | Tc1  | N5   | 89.12(9)   |  | C7   | N5   | Tc1  | 126.0(2) |
| N7   | Tc1  | N1   | 89.38(9)   |  | C7   | N5   | C8   | 107.0(3) |
| N7   | Tc1  | N5   | 179.52(9)  |  | N3   | C4   | N4   | 110.8(3) |

|     |     |     |          |  |     |     |    |          |
|-----|-----|-----|----------|--|-----|-----|----|----------|
| N5  | Tc1 | N1  | 91.08(9) |  | C2  | C3  | N1 | 109.6(3) |
| C9  | N6  | C15 | 127.4(3) |  | C9  | C8  | N5 | 108.6(3) |
| C7  | N6  | C15 | 124.9(3) |  | C3  | C2  | N2 | 106.0(3) |
| C7  | N6  | C9  | 107.6(3) |  | N1  | C1  | N2 | 110.5(3) |
| C11 | N8  | C16 | 126.9(3) |  | C8  | C9  | N6 | 106.7(3) |
| C10 | N8  | C11 | 107.6(3) |  | C5  | C6  | N4 | 106.4(3) |
| C10 | N8  | C16 | 125.4(3) |  | N5  | C7  | N6 | 110.2(3) |
| C4  | N4  | C6  | 107.5(3) |  | C12 | C11 | N8 | 106.6(3) |
| C4  | N4  | C14 | 126.4(3) |  | C11 | C12 | N7 | 109.1(3) |
| C6  | N4  | C14 | 126.1(3) |  | C6  | C5  | N3 | 109.2(3) |
| C2  | N2  | C13 | 126.0(3) |  | N7  | C10 | N8 | 110.7(3) |
| C1  | N2  | C2  | 108.0(3) |  |     |     |    |          |

**Table S7.** Hydrogen Bonds for **III** at 100 K.

| D  | H   | A                | d(D-H)/Å | d(H-A)/Å | d(D-A)/Å | D-H-A/° |
|----|-----|------------------|----------|----------|----------|---------|
| O4 | H4A | O3 <sup>1</sup>  | 0.85     | 1.94     | 2.775(4) | 167.8   |
| O4 | H4B | C11 <sup>2</sup> | 0.85     | 2.33     | 3.174(3) | 170.2   |
| O3 | H3A | O1               | 0.85     | 1.93     | 2.778(3) | 177.9   |
| O3 | H3B | C11              | 0.85     | 2.52     | 3.296(3) | 151.7   |

<sup>1</sup>+X,1+Y,+Z; <sup>2</sup>1+X,1+Y,+Z

**Table S8.** Torsion Angles for **III** at 100 K.

| A   | B   | C   | D   | Angle/°     |  | A   | B  | C   | D   | Angle/°   |
|-----|-----|-----|-----|-------------|--|-----|----|-----|-----|-----------|
| Tc1 | N1  | C3  | C2  | 176.2(2)    |  | C2  | N2 | C1  | N1  | -0.4(4)   |
| Tc1 | N1  | C1  | N2  | -175.88(19) |  | C1  | N2 | C2  | C3  | 0.1(4)    |
| Tc1 | N3  | C4  | N4  | 174.5(2)    |  | C1  | N1 | C3  | C2  | -0.5(3)   |
| Tc1 | N3  | C5  | C6  | -174.9(2)   |  | C9  | N6 | C7  | N5  | -0.4(3)   |
| Tc1 | N7  | C12 | C11 | 177.9(2)    |  | C6  | N4 | C4  | N3  | 0.6(4)    |
| Tc1 | N7  | C10 | N8  | -177.71(19) |  | C7  | N6 | C9  | C8  | 0.4(3)    |
| Tc1 | N5  | C8  | C9  | -178.8(2)   |  | C7  | N5 | C8  | C9  | 0.0(3)    |
| Tc1 | N5  | C7  | N6  | 179.00(19)  |  | C11 | N8 | C10 | N7  | -0.2(3)   |
| N8  | C11 | C12 | N7  | -0.4(3)     |  | C12 | N7 | C10 | N8  | 0.0(3)    |
| N4  | C6  | C5  | N3  | -0.3(4)     |  | C16 | N8 | C11 | C12 | -176.8(3) |
| N1  | C3  | C2  | N2  | 0.2(4)      |  | C16 | N8 | C10 | N7  | 177.0(3)  |
| N5  | C8  | C9  | N6  | -0.2(3)     |  | C5  | N3 | C4  | N4  | -0.8(4)   |
| C15 | N6  | C9  | C8  | 177.9(3)    |  | C10 | N8 | C11 | C12 | 0.4(3)    |
| C15 | N6  | C7  | N5  | -178.0(3)   |  | C10 | N7 | C12 | C11 | 0.3(3)    |
| C4  | N4  | C6  | C5  | -0.2(4)     |  | C13 | N2 | C2  | C3  | -179.6(3) |
| C4  | N3  | C5  | C6  | 0.7(4)      |  | C13 | N2 | C1  | N1  | 179.3(3)  |

|    |    |    |    |        |  |     |    |    |    |           |
|----|----|----|----|--------|--|-----|----|----|----|-----------|
| C3 | N1 | C1 | N2 | 0.6(3) |  | C14 | N4 | C4 | N3 | -178.6(3) |
| C8 | N5 | C7 | N6 | 0.3(3) |  | C14 | N4 | C6 | C5 | 179.0(3)  |

**Table S9.** Bond Lengths for **IV** at 100 K.

| Atom | Atom            | Length/Å   |  | Atom | Atom | Length/Å |
|------|-----------------|------------|--|------|------|----------|
| Tc1  | O1 <sup>1</sup> | 1.7493(19) |  | N1   | C3   | 1.376(4) |
| Tc1  | O1              | 1.7493(19) |  | N2   | C1   | 1.347(3) |
| Tc1  | N1 <sup>1</sup> | 2.132(2)   |  | N2   | C2   | 1.369(4) |
| Tc1  | N1              | 2.132(2)   |  | N2   | C7   | 1.458(3) |
| Tc1  | N3 <sup>1</sup> | 2.139(2)   |  | N3   | C4   | 1.319(4) |
| Tc1  | N3              | 2.139(2)   |  | N3   | C5   | 1.368(4) |
| Tc2  | O2 <sup>2</sup> | 1.710(2)   |  | N4   | C4   | 1.345(4) |
| Tc2  | O2              | 1.709(2)   |  | N4   | C6   | 1.364(5) |
| Tc2  | O3              | 1.707(2)   |  | N4   | C8   | 1.474(4) |
| Tc2  | O3 <sup>2</sup> | 1.707(2)   |  | C2   | C3   | 1.358(4) |
| N1   | C1              | 1.324(3)   |  | C6   | C5   | 1.349(4) |

<sup>1</sup>1-X,1-Y,1-Z; <sup>2</sup>1-X,+Y,3/2-Z

**Table S10.** Bond Angles for **IV** at 100 K.

| Atom            | Atom | Atom            | Angle/°    |  | Atom | Atom | Atom            | Angle/°    |
|-----------------|------|-----------------|------------|--|------|------|-----------------|------------|
| O1 <sup>1</sup> | Tc1  | O1              | 180.00(9)  |  | O3   | Tc2  | O3 <sup>2</sup> | 110.42(16) |
| O1              | Tc1  | N1 <sup>1</sup> | 90.36(9)   |  | C1   | N1   | Tc1             | 126.12(18) |
| O1 <sup>1</sup> | Tc1  | N1 <sup>1</sup> | 89.64(9)   |  | C1   | N1   | C3              | 106.3(2)   |
| O1              | Tc1  | N1              | 89.64(9)   |  | C3   | N1   | Tc1             | 127.44(18) |
| O1 <sup>1</sup> | Tc1  | N1              | 90.36(9)   |  | C1   | N2   | C2              | 107.3(2)   |
| O1              | Tc1  | N3              | 89.19(9)   |  | C1   | N2   | C7              | 125.2(3)   |
| O1 <sup>1</sup> | Tc1  | N3              | 90.81(9)   |  | C2   | N2   | C7              | 127.5(3)   |
| O1              | Tc1  | N3 <sup>1</sup> | 90.81(9)   |  | C4   | N3   | Tc1             | 128.1(2)   |
| O1 <sup>1</sup> | Tc1  | N3 <sup>1</sup> | 89.19(9)   |  | C4   | N3   | C5              | 105.9(2)   |
| N1              | Tc1  | N1 <sup>1</sup> | 180.0      |  | C5   | N3   | Tc1             | 126.0(2)   |
| N1              | Tc1  | N3 <sup>1</sup> | 91.97(8)   |  | C4   | N4   | C6              | 107.4(3)   |
| N1 <sup>1</sup> | Tc1  | N3              | 91.97(8)   |  | C4   | N4   | C8              | 125.6(3)   |
| N1              | Tc1  | N3              | 88.03(8)   |  | C6   | N4   | C8              | 127.0(3)   |
| N1 <sup>1</sup> | Tc1  | N3 <sup>1</sup> | 88.03(8)   |  | N1   | C1   | N2              | 110.8(2)   |
| N3              | Tc1  | N3 <sup>1</sup> | 180.0      |  | C3   | C2   | N2              | 106.7(3)   |
| O2              | Tc2  | O2 <sup>2</sup> | 110.7(2)   |  | C2   | C3   | N1              | 108.9(3)   |
| O3              | Tc2  | O2 <sup>2</sup> | 109.16(12) |  | N3   | C4   | N4              | 110.7(3)   |
| O3              | Tc2  | O2              | 108.68(11) |  | C5   | C6   | N4              | 106.3(3)   |

|                 |     |                 |            |  |    |    |    |          |
|-----------------|-----|-----------------|------------|--|----|----|----|----------|
| O3 <sup>2</sup> | Tc2 | O2 <sup>2</sup> | 108.68(11) |  | C6 | C5 | N3 | 109.6(3) |
| O3 <sup>2</sup> | Tc2 | O2              | 109.17(12) |  |    |    |    |          |

$$^11\text{-X},1\text{-Y},1\text{-Z}; ^21\text{-X},+Y,3/2\text{-Z}$$

**Table S11.** Hydrogen Bonds for **IV** at 100 K.

| D  | H   | A               | d(D-H)/Å | d(H-A)/Å | d(D-A)/Å | D-H-A/° |
|----|-----|-----------------|----------|----------|----------|---------|
| C1 | H1  | O3              | 0.95     | 2.48     | 3.183(4) | 130.6   |
| C2 | H2  | O2 <sup>1</sup> | 0.95     | 2.45     | 3.267(4) | 144.3   |
| C3 | H3  | O3 <sup>2</sup> | 0.95     | 2.56     | 3.229(4) | 127.9   |
| C7 | H7A | O1 <sup>3</sup> | 0.98     | 2.39     | 3.163(4) | 135.0   |
| C7 | H7C | O2 <sup>4</sup> | 0.98     | 2.40     | 3.331(4) | 159.5   |
| C6 | H6  | O2 <sup>5</sup> | 0.95     | 2.37     | 3.250(4) | 153.6   |

$$^11/2+X,-1/2+Y,+Z; ^23/2-X,-1/2+Y,3/2-Z; ^31-X,+Y,3/2-Z; ^43/2-X,3/2-Y,2-Z; ^5+X,2-Y,-1/2+Z$$

**Table S12.** Torsion Angles for **IV** at 100 K.

| A   | B  | C  | D  | Angle/°     | A  | B  | C  | D  | Angle/°   |
|-----|----|----|----|-------------|----|----|----|----|-----------|
| Tc1 | N1 | C1 | N2 | -175.79(17) | C3 | N1 | C1 | N2 | -0.3(3)   |
| Tc1 | N1 | C3 | C2 | 175.81(19)  | C7 | N2 | C1 | N1 | 177.9(2)  |
| Tc1 | N3 | C4 | N4 | -177.59(19) | C7 | N2 | C2 | C3 | -177.6(3) |
| Tc1 | N3 | C5 | C6 | 177.9(2)    | C4 | N3 | C5 | C6 | 0.2(3)    |
| N2  | C2 | C3 | N1 | -0.4(3)     | C4 | N4 | C6 | C5 | 0.5(4)    |
| N4  | C6 | C5 | N3 | -0.4(4)     | C6 | N4 | C4 | N3 | -0.4(4)   |
| C1  | N1 | C3 | C2 | 0.4(3)      | C5 | N3 | C4 | N4 | 0.1(3)    |
| C1  | N2 | C2 | C3 | 0.2(3)      | C8 | N4 | C4 | N3 | 179.5(3)  |
| C2  | N2 | C1 | N1 | 0.1(3)      | C8 | N4 | C6 | C5 | -179.4(3) |

**Table S13.** Bond Lengths for **V** at 100 K.

| Atom | Atom | Length/Å   | Atom | Atom | Length/Å   |
|------|------|------------|------|------|------------|
| Tc1  | O1   | 1.7034(10) | N3   | C4   | 1.3773(18) |
| Tc1  | O2   | 1.7105(11) | N4   | C1   | 1.3307(15) |
| Tc1  | O3   | 1.7080(10) | N11  | C12  | 1.3402(18) |
| Tc1  | O4   | 1.7246(9)  | N11  | C15  | 1.3737(17) |
| S1   | C1   | 1.7054(12) | N11  | C16  | 1.4603(18) |
| N1   | C2   | 1.3381(17) | N13  | C12  | 1.3225(18) |

|    |    |            |  |     |     |            |
|----|----|------------|--|-----|-----|------------|
| N1 | C5 | 1.3774(17) |  | N13 | C14 | 1.3772(17) |
| N1 | C6 | 1.4647(18) |  | C4  | C5  | 1.358(2)   |
| N2 | C1 | 1.3350(15) |  | C14 | C15 | 1.3554(19) |
| N3 | C2 | 1.3256(16) |  |     |     |            |

**Table S14.** Bond Angles for **V** at 100 K.

| Atom | Atom | Atom | Angle/°    |  | Atom | Atom | Atom | Angle/°    |
|------|------|------|------------|--|------|------|------|------------|
| O1   | Tc1  | O2   | 108.91(6)  |  | C15  | N11  | C16  | 126.04(12) |
| O1   | Tc1  | O3   | 110.04(6)  |  | C12  | N13  | C14  | 106.37(12) |
| O1   | Tc1  | O4   | 109.38(5)  |  | N2   | C1   | S1   | 121.39(9)  |
| O2   | Tc1  | O4   | 109.33(5)  |  | N4   | C1   | S1   | 120.88(9)  |
| O3   | Tc1  | O2   | 109.64(6)  |  | N4   | C1   | N2   | 117.72(11) |
| O3   | Tc1  | O4   | 109.53(5)  |  | N3   | C2   | N1   | 109.89(11) |
| C2   | N1   | C5   | 108.03(11) |  | C5   | C4   | N3   | 108.23(12) |
| C2   | N1   | C6   | 125.32(12) |  | C4   | C5   | N1   | 106.51(12) |
| C5   | N1   | C6   | 126.66(12) |  | N13  | C12  | N11  | 110.71(12) |
| C2   | N3   | C4   | 107.34(11) |  | C15  | C14  | N13  | 108.93(12) |
| C12  | N11  | C15  | 107.57(11) |  | C14  | C15  | N11  | 106.42(12) |
| C12  | N11  | C16  | 126.36(12) |  |      |      |      |            |

**Table S15.** Hydrogen Bonds for **V** at 100 K.

| D   | H    | A               | d(D-H)/Å | d(H-A)/Å | d(D-A)/Å   | D-H-A/° |
|-----|------|-----------------|----------|----------|------------|---------|
| N2  | H2A  | O3 <sup>1</sup> | 0.88     | 2.39     | 2.8943(15) | 116.8   |
| N2  | H2A  | O4 <sup>2</sup> | 0.88     | 2.26     | 3.0230(15) | 144.6   |
| N2  | H2B  | S1 <sup>1</sup> | 0.88     | 2.57     | 3.4477(11) | 171.9   |
| N3  | H3   | N13             | 0.88     | 1.85     | 2.7246(17) | 172.3   |
| N4  | H4A  | O1 <sup>3</sup> | 0.88     | 2.43     | 2.8781(15) | 112.3   |
| N4  | H4A  | O4 <sup>2</sup> | 0.88     | 2.16     | 2.9460(14) | 148.5   |
| N4  | H4B  | S1 <sup>3</sup> | 0.88     | 2.54     | 3.4063(11) | 169.8   |
| N13 | H13  | N3              | 0.88     | 1.86     | 2.7246(17) | 168.7   |
| C2  | H2   | O3              | 0.95     | 2.27     | 3.1585(16) | 156.2   |
| C4  | H4   | S1 <sup>4</sup> | 0.95     | 2.92     | 3.8357(14) | 161.1   |
| C5  | H5   | O1 <sup>5</sup> | 0.95     | 2.65     | 3.4910(19) | 148.3   |
| C14 | H14  | S1 <sup>4</sup> | 0.95     | 2.80     | 3.7200(14) | 164.1   |
| C15 | H15  | O4 <sup>6</sup> | 0.95     | 2.53     | 3.4443(17) | 162.6   |
| C16 | H16C | O2 <sup>6</sup> | 0.98     | 2.59     | 3.5054(19) | 156.2   |

<sup>1</sup>1/2-X,-1/2+Y,1/2-Z; <sup>2</sup>-1+X,+Y,+Z; <sup>3</sup>1/2-X,1/2+Y,1/2-Z; <sup>4</sup>1-X,1-Y,1-Z; <sup>5</sup>1/2+X,1/2-Y,1/2+Z; <sup>6</sup>-1/2+X,3/2-Y,1/2+Z

**Table S16.** Torsion Angles for **V** at 100 K.

| <b>A</b> | <b>B</b> | <b>C</b> | <b>D</b> | <b>Angle/°</b> |  | <b>A</b> | <b>B</b> | <b>C</b> | <b>D</b> | <b>Angle/°</b> |
|----------|----------|----------|----------|----------------|--|----------|----------|----------|----------|----------------|
| N3       | C4       | C5       | N1       | -0.44(16)      |  | C6       | N1       | C5       | C4       | -179.78(12)    |
| N1<br>3  | C1<br>4  | C1<br>5  | N1<br>1  | 0.20(16)       |  | C1<br>2  | N1<br>1  | C1<br>5  | C1<br>4  | -0.08(15)      |
| C2       | N1       | C5       | C4       | 0.26(15)       |  | C1<br>2  | N1<br>3  | C1<br>4  | C1<br>5  | -0.25(16)      |
| C2       | N3       | C4       | C5       | 0.46(15)       |  | C1<br>4  | N1<br>3  | C1<br>2  | N1<br>1  | 0.20(15)       |
| C4       | N3       | C2       | N1       | -0.30(15)      |  | C1<br>5  | N1<br>1  | C1<br>2  | N1<br>3  | -0.08(15)      |
| C5       | N1       | C2       | N3       | 0.03(15)       |  | C1<br>6  | N1<br>1  | C1<br>2  | N1<br>3  | 178.11(12)     |
| C6       | N1       | C2       | N3       | -179.93(12)    |  | C1<br>6  | N1<br>1  | C1<br>5  | C1<br>4  | -178.27(13)    |

**Table S17.** Bond Lengths for **VI** at 296 K.

| <b>Atom</b> | <b>Atom</b>       | <b>Length/Å</b> |  | <b>Atom</b> | <b>Atom</b> | <b>Length/Å</b> |
|-------------|-------------------|-----------------|--|-------------|-------------|-----------------|
| Tc01        | Cl02 <sup>1</sup> | 2.3378(12)      |  | N2          | C3          | 1.3165          |
| Tc01        | Cl02              | 2.3378(12)      |  | N2          | C6          | 1.3788          |
| Tc01        | Cl03              | 2.3642(11)      |  | C3          | N4          | 1.3685          |
| Tc01        | Cl03 <sup>1</sup> | 2.3641(11)      |  | N4          | C5          | 1.3816          |
| Tc01        | Cl04 <sup>1</sup> | 2.3392(12)      |  | C5          | C6          | 1.3748          |
| Tc01        | Cl04              | 2.3392(12)      |  |             |             |                 |

<sup>1</sup>1-X,1-Y,1-Z**Table S18.** Bond Angles for **VI** at 296 K.

| <b>Atom</b>       | <b>Atom</b> | <b>Atom</b>       | <b>Angle/°</b> |  | <b>Atom</b>       | <b>Atom</b> | <b>Atom</b>       | <b>Angle/°</b> |
|-------------------|-------------|-------------------|----------------|--|-------------------|-------------|-------------------|----------------|
| Cl02 <sup>1</sup> | Tc01        | Cl02              | 180.0          |  | Cl04              | Tc01        | Cl03              | 90.0           |
| Cl02 <sup>1</sup> | Tc01        | Cl03 <sup>1</sup> | 91.05(5)       |  | Cl04 <sup>1</sup> | Tc01        | Cl03              | 90.0           |
| Cl02 <sup>1</sup> | Tc01        | Cl03              | 88.95(5)       |  | Cl04 <sup>1</sup> | Tc01        | Cl03 <sup>1</sup> | 90.0           |
| Cl02              | Tc01        | Cl03              | 91.06(5)       |  | Cl04              | Tc01        | Cl03 <sup>1</sup> | 90.0           |
| Cl02              | Tc01        | Cl03 <sup>1</sup> | 88.94(5)       |  | Cl04 <sup>1</sup> | Tc01        | Cl04              | 180.0          |
| Cl02 <sup>1</sup> | Tc01        | Cl04 <sup>1</sup> | 90.0           |  | C3                | N2          | C6                | 105.4          |
| Cl02              | Tc01        | Cl04              | 90.0           |  | N2                | C3          | N4                | 111.6          |



|                   |      |                   |       |  |    |    |    |       |
|-------------------|------|-------------------|-------|--|----|----|----|-------|
| Cl02 <sup>1</sup> | Tc01 | Cl04              | 90.0  |  | C3 | N4 | C5 | 107.3 |
| Cl02              | Tc01 | Cl04 <sup>1</sup> | 90.0  |  | C6 | C5 | N4 | 105.0 |
| Cl03 <sup>1</sup> | Tc01 | Cl03              | 180.0 |  | C5 | C6 | N2 | 110.7 |

<sup>1</sup>1-X,1-Y,1-Z

**Table S19.** Hydrogen Bonds for **VI** at 296 K.

| <b>D</b> | <b>H</b> | <b>A</b>          | <b>d(D-H)/Å</b> | <b>d(H-A)/Å</b> | <b>d(D-A)/Å</b> | <b>D-H-A/°</b> |
|----------|----------|-------------------|-----------------|-----------------|-----------------|----------------|
| N2       | H2       | Cl02 <sup>1</sup> | 0.86            | 2.56            | 3.330(9)        | 149.2          |
| N4       | H4       | Cl03              | 0.86            | 2.68            | 3.340(5)        | 135.0          |
| N4       | H4       | Cl04 <sup>2</sup> | 0.86            | 2.83            | 3.351(5)        | 120.7          |

<sup>1</sup>3/2-X,1/2+Y,2-Z; <sup>2</sup>1/2+X,-1/2+Y,+Z

**Table S20.** Torsion Angles for **VI** at 296 K.

| <b>A</b> | <b>B</b> | <b>C</b> | <b>D</b> | <b>Angle/°</b> | <b>A</b> | <b>B</b> | <b>C</b> | <b>D</b> | <b>Angle/°</b> |
|----------|----------|----------|----------|----------------|----------|----------|----------|----------|----------------|
| N2       | C3       | N4       | C5       | 0.0            | N4       | C5       | C6       | N2       | 0.0            |
| C3       | N2       | C6       | C5       | 0.0            | C6       | N2       | C3       | N4       | 0.0            |
| C3       | N4       | C5       | C6       | 0.0            |          |          |          |          |                |

**Table S21.** Atomic Occupancy for **VI** at 296 K.

| <b>Atom</b> | <b>Occupancy</b> | <b>Atom</b> | <b>Occupancy</b> | <b>Atom</b> | <b>Occupancy</b> |
|-------------|------------------|-------------|------------------|-------------|------------------|
| N2          | 0.5              | H2          | 0.5              | C3          | 0.5              |
| H3          | 0.5              | N4          | 0.5              | H4          | 0.5              |
| C5          | 0.5              | H5          | 0.5              | C6          | 0.5              |
| H6          | 0.5              |             |                  |             |                  |

**Table S22.** Bond Lengths for **VII** at 296 K.

| <b>Atom</b> | <b>Atom</b>      | <b>Length/Å</b> | <b>Atom</b> | <b>Atom</b> | <b>Length/Å</b> |
|-------------|------------------|-----------------|-------------|-------------|-----------------|
| Tc1         | Br1              | 2.5541(6)       | N2          | C1          | 1.285(8)        |
| Tc1         | Br1 <sup>1</sup> | 2.5540(6)       | N2          | C3          | 1.349(8)        |
| Tc1         | Br2              | 2.5218(6)       | N5          | C1          | 1.307(9)        |
| Tc1         | Br2 <sup>1</sup> | 2.5218(6)       | N5          | C4          | 1.376(9)        |
| Tc1         | Br3 <sup>1</sup> | 2.5227(6)       | C3          | C4          | 1.297(9)        |

|     |     |           |  |  |  |
|-----|-----|-----------|--|--|--|
| Tc1 | Br3 | 2.5227(6) |  |  |  |
|-----|-----|-----------|--|--|--|

<sup>1</sup>1-X,1-Y,1-Z

**Table S23.** Bond Angles for **VII** at 296 K.

| Atom             | Atom | Atom             | Angle/°    |  | Atom             | Atom | Atom             | Angle/°    |
|------------------|------|------------------|------------|--|------------------|------|------------------|------------|
| Br1 <sup>1</sup> | Tc1  | Br1              | 180.0      |  | Br3              | Tc1  | Br1              | 90.951(19) |
| Br2              | Tc1  | Br1 <sup>1</sup> | 90.545(19) |  | Br3              | Tc1  | Br1 <sup>1</sup> | 89.05(2)   |
| Br2 <sup>1</sup> | Tc1  | Br1 <sup>1</sup> | 89.454(19) |  | Br3 <sup>1</sup> | Tc1  | Br1              | 89.05(2)   |
| Br2 <sup>1</sup> | Tc1  | Br1              | 90.546(19) |  | Br3 <sup>1</sup> | Tc1  | Br1 <sup>1</sup> | 90.95(2)   |
| Br2              | Tc1  | Br1              | 89.455(19) |  | Br3 <sup>1</sup> | Tc1  | Br3              | 180.0      |
| Br2              | Tc1  | Br2 <sup>1</sup> | 180.0      |  | C1               | N2   | C3               | 109.5(6)   |
| Br2              | Tc1  | Br3 <sup>1</sup> | 89.872(16) |  | C1               | N5   | C4               | 109.5(5)   |
| Br2              | Tc1  | Br3              | 90.127(16) |  | N2               | C1   | N5               | 107.2(6)   |
| Br2 <sup>1</sup> | Tc1  | Br3              | 89.873(16) |  | C4               | C3   | N2               | 108.6(6)   |
| Br2 <sup>1</sup> | Tc1  | Br3 <sup>1</sup> | 90.128(16) |  | C3               | C4   | N5               | 105.1(6)   |

<sup>1</sup>1-X,1-Y,1-Z

**Table S24.** Hydrogen Bonds for **VII** at 296 K.

| D  | H  | A                | d(D-H)/Å | d(H-A)/Å | d(D-A)/Å | D-H-A/° |
|----|----|------------------|----------|----------|----------|---------|
| N2 | H2 | Br2 <sup>1</sup> | 0.86     | 2.82     | 3.500(5) | 136.8   |
| N2 | H2 | Br3 <sup>2</sup> | 0.86     | 2.91     | 3.582(6) | 136.5   |
| N5 | H5 | Br1              | 0.86     | 2.77     | 3.488(5) | 141.6   |

<sup>1</sup>-1+X,3/2-Y,-1/2+Z; <sup>2</sup>-X,1/2+Y,1/2-Z

**Table S25.** Torsion Angles for **VII** at 296 K.

| A  | B  | C  | D  | Angle/° |  | A  | B  | C  | D  | Angle/° |
|----|----|----|----|---------|--|----|----|----|----|---------|
| N2 | C3 | C4 | N5 | 0.8(7)  |  | C3 | N2 | C1 | N5 | -1.6(7) |
| C1 | N2 | C3 | C4 | 0.5(7)  |  | C4 | N5 | C1 | N2 | 2.1(8)  |
| C1 | N5 | C4 | C3 | -1.8(8) |  |    |    |    |    |         |

**Table S26.** Bond Lengths for **VIII** at 100 K.

| Atom | Atom | Length/Å   |  | Atom | Atom | Length/Å |
|------|------|------------|--|------|------|----------|
| Sn1  | Cl2  | 2.3987(4)  |  | N4   | C17  | 1.331(2) |
| Sn1  | Cl3  | 2.4099(4)  |  | N4   | C19  | 1.372(2) |
| Sn1  | Cl4  | 2.4079(4)  |  | N5   | C14  | 1.325(2) |
| Sn1  | Cl5  | 2.4221(4)  |  | N5   | C15  | 1.376(2) |
| Sn1  | Cl7  | 2.3942(4)  |  | N5   | C24  | 1.464(2) |
| Sn1  | Cl9  | 2.4103(4)  |  | C7   | C11  | 1.347(2) |
| N1   | C6   | 1.327(2)   |  | N8   | C13  | 1.325(2) |
| N1   | C11  | 1.369(2)   |  | N8   | C23  | 1.370(2) |
| N2   | C6   | 1.326(2)   |  | N9   | C17  | 1.326(2) |
| N2   | C7   | 1.377(2)   |  | N9   | C21  | 1.370(2) |
| N2   | C10  | 1.462(2)   |  | N12  | C14  | 1.317(2) |
| N3   | C13  | 1.3273(19) |  | N12  | C18  | 1.367(2) |
| N3   | C20  | 1.373(2)   |  | C15  | C18  | 1.344(2) |
| N3   | C22  | 1.460(2)   |  | C19  | C21  | 1.338(2) |
| N4   | C16  | 1.463(2)   |  | C20  | C23  | 1.343(2) |

**Table S27.** Bond Angles for **VIII** at 100 K.

| Atom | Atom | Atom | Angle/°     |  | Atom | Atom | Atom | Angle/°    |
|------|------|------|-------------|--|------|------|------|------------|
| Cl2  | Sn1  | Cl3  | 90.638(13)  |  | C17  | N4   | C16  | 125.65(14) |
| Cl2  | Sn1  | Cl4  | 89.599(13)  |  | C17  | N4   | C19  | 108.39(14) |
| Cl2  | Sn1  | Cl5  | 90.288(13)  |  | C19  | N4   | C16  | 125.95(14) |
| Cl2  | Sn1  | Cl9  | 179.169(14) |  | C14  | N5   | C15  | 108.40(14) |
| Cl3  | Sn1  | Cl5  | 88.943(14)  |  | C14  | N5   | C24  | 125.95(16) |
| Cl3  | Sn1  | Cl9  | 90.139(14)  |  | C15  | N5   | C24  | 125.65(15) |
| Cl4  | Sn1  | Cl3  | 90.819(14)  |  | N2   | C6   | N1   | 108.19(14) |
| Cl4  | Sn1  | Cl5  | 179.736(16) |  | C11  | C7   | N2   | 107.01(14) |
| Cl4  | Sn1  | Cl9  | 90.097(13)  |  | C13  | N8   | C23  | 108.92(14) |
| Cl7  | Sn1  | Cl2  | 89.769(14)  |  | C17  | N9   | C21  | 108.68(14) |
| Cl7  | Sn1  | Cl3  | 178.146(14) |  | C7   | C11  | N1   | 106.96(14) |
| Cl7  | Sn1  | Cl4  | 90.992(15)  |  | C14  | N12  | C18  | 109.11(15) |
| Cl7  | Sn1  | Cl5  | 89.246(15)  |  | N8   | C13  | N3   | 108.18(14) |
| Cl7  | Sn1  | Cl9  | 89.463(14)  |  | N12  | C14  | N5   | 108.54(15) |
| Cl9  | Sn1  | Cl5  | 90.020(13)  |  | C18  | C15  | N5   | 106.99(14) |
| C6   | N1   | C11  | 109.12(14)  |  | N9   | C17  | N4   | 108.34(14) |
| C6   | N2   | C7   | 108.71(13)  |  | C15  | C18  | N12  | 106.97(15) |
| C6   | N2   | C10  | 125.90(14)  |  | C21  | C19  | N4   | 107.31(14) |
| C7   | N2   | C10  | 125.32(14)  |  | C23  | C20  | N3   | 107.03(14) |
| C13  | N3   | C20  | 108.74(14)  |  | C19  | C21  | N9   | 107.28(14) |
| C13  | N3   | C22  | 125.36(14)  |  | C20  | C23  | N8   | 107.12(15) |
| C20  | N3   | C22  | 125.82(13)  |  |      |      |      |            |

**Table S28.** Hydrogen Bonds for **VIII** at 100 K

| <b>Table 6 Hydrogen Bonds for VIII at 296 K.</b> |          |                  |                 |                 |                 |                |
|--------------------------------------------------|----------|------------------|-----------------|-----------------|-----------------|----------------|
| <b>D</b>                                         | <b>H</b> | <b>A</b>         | <b>d(D-H)/Å</b> | <b>d(H-A)/Å</b> | <b>d(D-A)/Å</b> | <b>D-H-A/°</b> |
| N1                                               | H1       | C11              | 0.87(2)         | 2.22(2)         | 3.0741(15)      | 167.4(18)      |
| N8                                               | H8       | Cl6 <sup>1</sup> | 0.86(2)         | 2.23(2)         | 3.0836(15)      | 171.2(19)      |
| N9                                               | H9       | Cl1 <sup>2</sup> | 0.88(2)         | 2.23(2)         | 3.0810(15)      | 164.1(18)      |
| N12                                              | H12      | Cl6              | 0.82(2)         | 2.24(2)         | 3.0563(15)      | 174(2)         |

<sup>1</sup>1-X,1/2+Y,1/2-Z; <sup>2</sup>2-X,2-Y,1-Z

**Table S29.** Torsion Angles for **VIII** at 100 K.

| <b>A</b> | <b>B</b> | <b>C</b> | <b>D</b> | <b>Angle/°</b> |  | <b>A</b> | <b>B</b> | <b>C</b> | <b>D</b> | <b>Angle/°</b> |
|----------|----------|----------|----------|----------------|--|----------|----------|----------|----------|----------------|
| N2       | C7       | C11      | N1       | -0.05(17)      |  | C15      | N5       | C14      | N12      | -0.50(19)      |
| N3       | C20      | C23      | N8       | 0.26(19)       |  | C16      | N4       | C17      | N9       | 178.71(14)     |
| N4       | C19      | C21      | N9       | -0.11(18)      |  | C16      | N4       | C19      | C21      | -178.64(15)    |
| N5       | C15      | C18      | N12      | -0.40(18)      |  | C17      | N4       | C19      | C21      | 0.08(18)       |
| C6       | N1       | C11      | C7       | 0.00(18)       |  | C17      | N9       | C21      | C19      | 0.11(18)       |
| C6       | N2       | C7       | C11      | 0.09(17)       |  | C18      | N12      | C14      | N5       | 0.2(2)         |
| C7       | N2       | C6       | N1       | -0.09(17)      |  | C19      | N4       | C17      | N9       | -0.02(17)      |
| C10      | N2       | C6       | N1       | -177.20(14)    |  | C20      | N3       | C13      | N8       | 0.09(18)       |
| C10      | N2       | C7       | C11      | 177.22(14)     |  | C21      | N9       | C17      | N4       | -0.06(17)      |
| C11      | N1       | C6       | N2       | 0.06(18)       |  | C22      | N3       | C13      | N8       | -176.86(15)    |
| C13      | N3       | C20      | C23      | -0.22(19)      |  | C22      | N3       | C20      | C23      | 176.71(16)     |
| C13      | N8       | C23      | C20      | -0.21(19)      |  | C23      | N8       | C13      | N3       | 0.07(18)       |
| C14      | N5       | C15      | C18      | 0.56(19)       |  | C24      | N5       | C14      | N12      | 179.70(16)     |
| C14      | N12      | C18      | C15      | 0.1(2)         |  | C24      | N5       | C15      | C18      | -179.64(16)    |
